# Supplementary material for: HBV Core Protein Is in Flux between Cytoplasmic, Nuclear, and Nucleolar Compartments
Source: PubMed Central journal article supplement (PMC8545122; doi:10.1128/mbio.03514-20), 2021-02-09
Supplement: mbio.03514-20-sf004.pdf [file mbio.03514-20-sf004.pdf]

## HBV core protein is in flux between cytoplasmic, nuclear, and nucleolar compartments

Smita Nair and Adam Zlotnick

Supplemental data

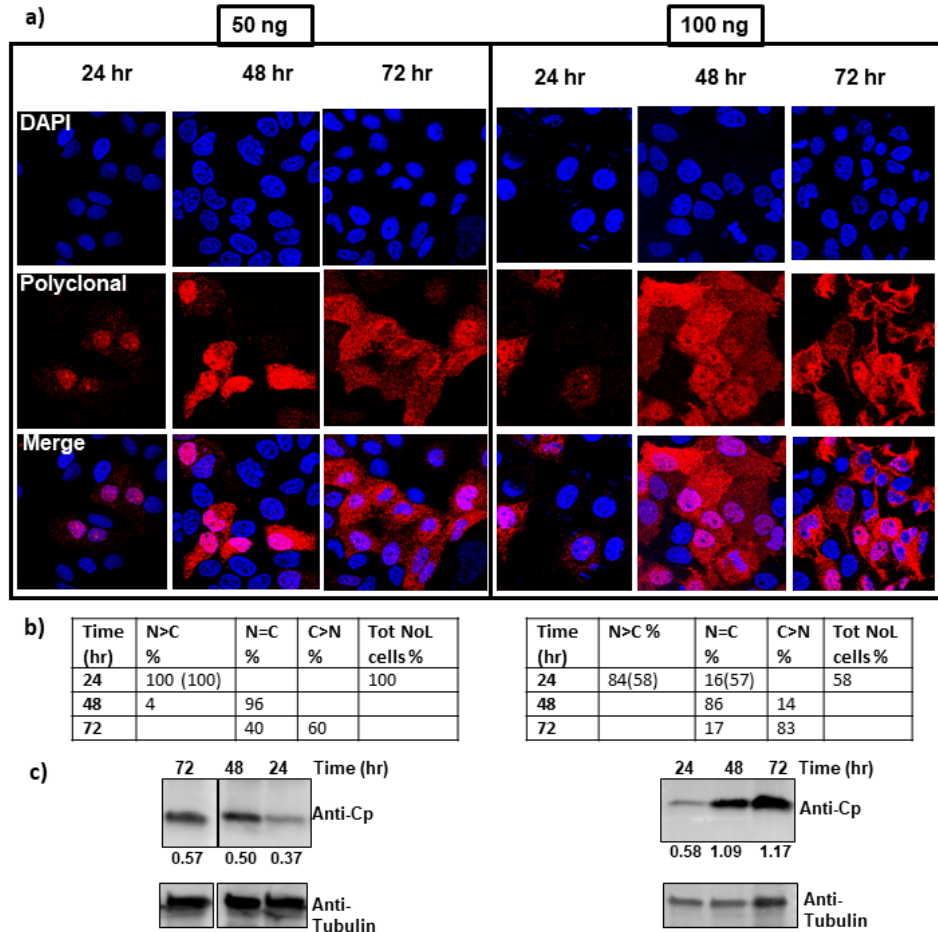

**Figure S4. Time Course of Cp localization when expressed from LJ144 plasmid, an env<sup>-</sup> genomic clone.**

(a) A time course study with both 50 and 100 ng of LJ144 plasmid shows a systematic shift in Cp localization from nucleolar/nuclear to cell wide to cytoplasmic. (b) Cells were categorized based on their Cp distribution as described in the legend of figure 5; number in parentheses denotes the percent cells that also has nucleolar localized Cp. (c) Western blot showing increase in amount of Cp over time post-transfection. A ratio of Cp to tubulin signal is denoted below the blot as a readout on Cp production.
