# Supplementary material for: HBV Core Protein Is in Flux between Cytoplasmic, Nuclear, and Nucleolar Compartments
Source: PubMed Central journal article supplement (PMC8545122; doi:10.1128/mbio.03514-20), 2021-02-09
Supplement: mbio.03514-20-sf005.pdf [file mbio.03514-20-sf005.pdf]

## HBV core protein is in flux between cytoplasmic, nuclear, and nucleolar compartments

Smita Nair and Adam Zlotnick

Supplemental data

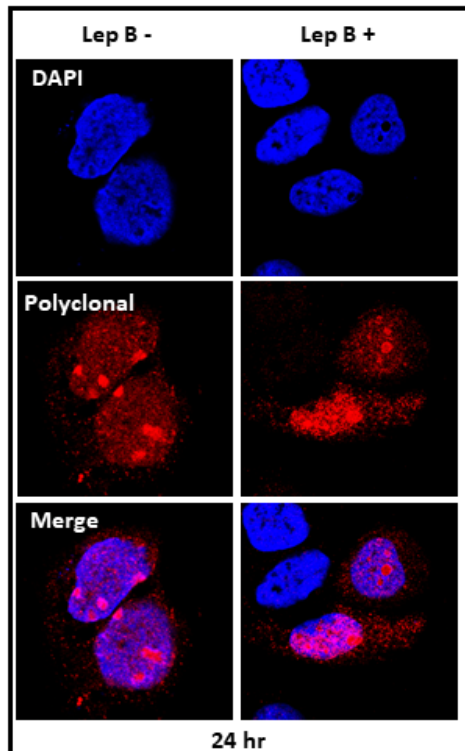

**Figure S5. Nucleolar shuttling of Cp is independent of CRM1.** Paired experiments at 24hours post-transfection with 18ng of pTruf-HBc DNA, shows nucleolar Cp localization remains unaffected by Leptomycin B treatment.
