# Supplementary material for: HBV Core Protein Is in Flux between Cytoplasmic, Nuclear, and Nucleolar Compartments
Source: PubMed Central journal article supplement (PMC8545122; doi:10.1128/mbio.03514-20), 2021-02-09
Supplement: mbio.03514-20-sf006.pdf [file mbio.03514-20-sf006.pdf]

## HBV core protein is in flux between cytoplasmic, nuclear, and nucleolar compartments

Smita Nair and Adam Zlotnick

Supplemental data

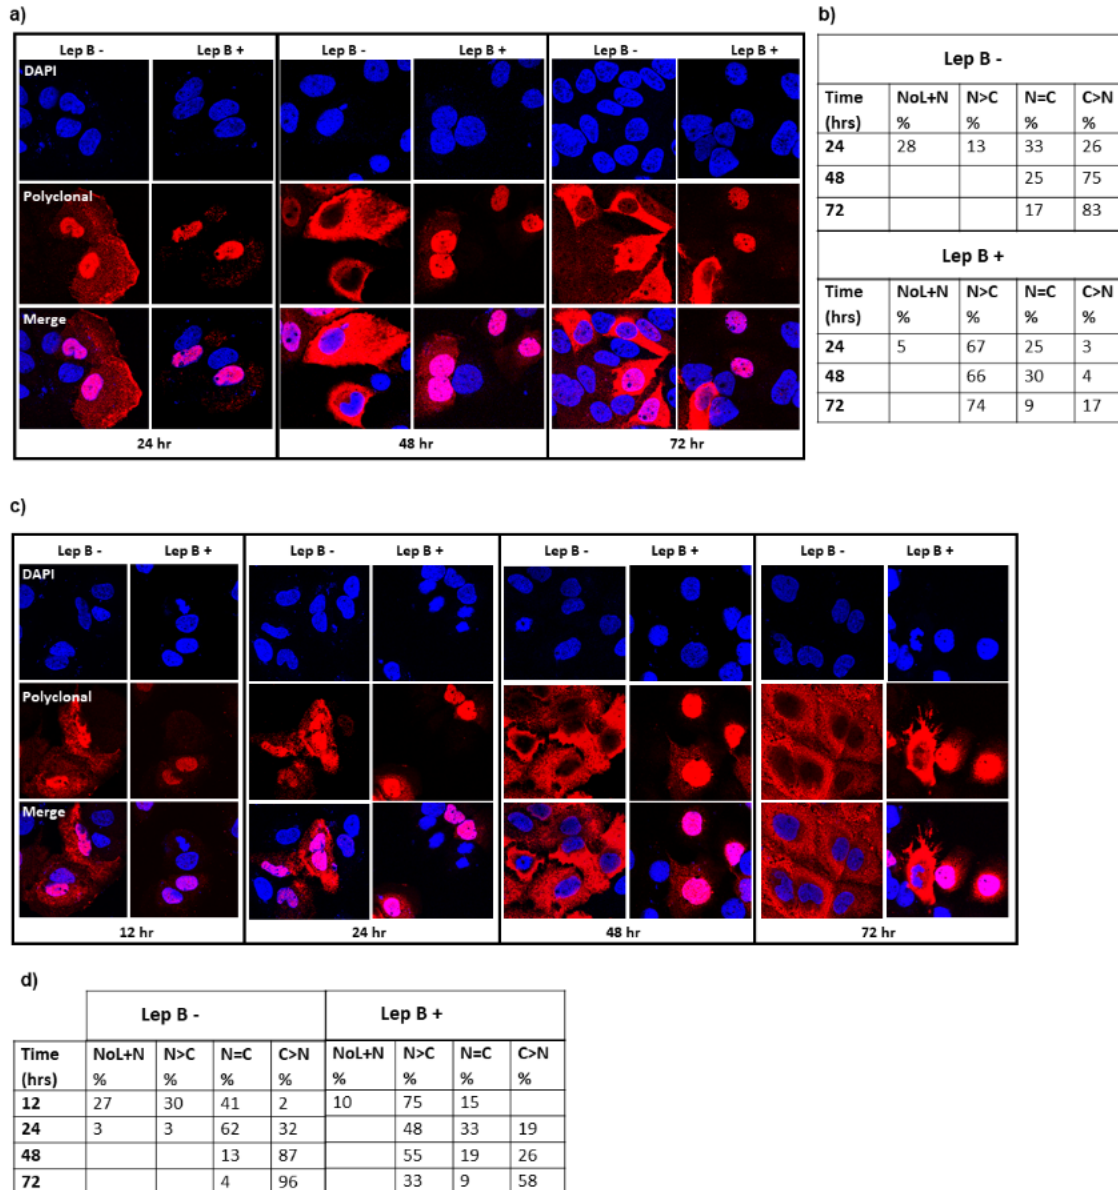

**Figure S6. Cp export from nuclei are dependent upon CRM1.** Paired experiments at 12, 24, 48, and 72 hours post-transfection by (a) 37 ng or (c) 75 ng of pTruf-HBc DNA. The left column in each pair is a control and the right column shows the effect 30 nM leptomycin B on Cp localization. (b and d) Cells are categorized based on intracellular Cp distribution for each transfection as described in the legend of figure 2. A western blot comparing the amount of CRM1 and Cp in these transfections, with and without Lep B treatment, is shown in figure 7c.
